# Supplementary material for: Identification and Characterization of Antigenic Properties of Schistosoma japonicum Heat Shock Protein 90α Derived Peptides
Source: MDPI journal article supplement (doi:10.3390/pathogens11111238), 2022-10-26
Supplement: s1 [file s1]

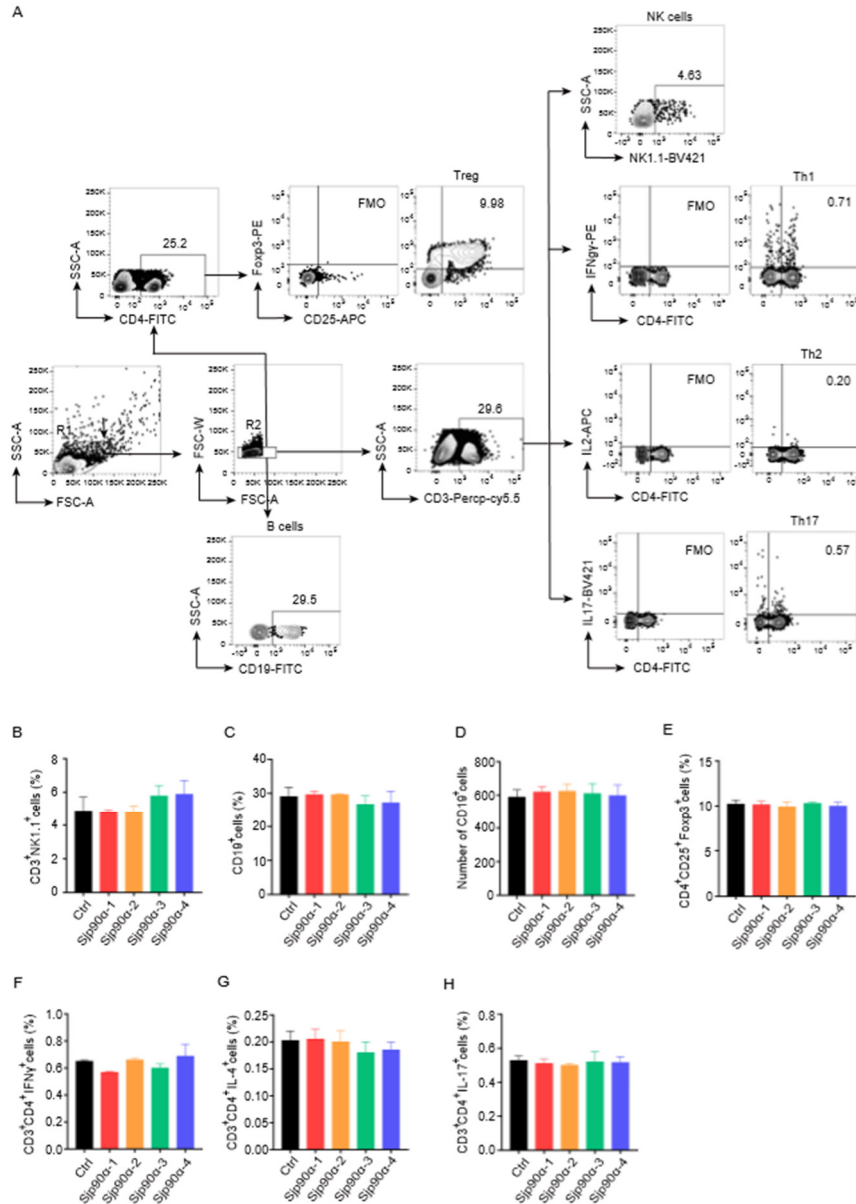

**Supplementary Figure S1.** Different effects of Sjp90α-derived peptides on immune cells. Mouse splenocytes were treated with Sjp90α-derived peptides (40μg/ml) (n = 4–5 wells, in quadruplication or quintuplicate) or PBS for 24h and analyzed by flow cytometry. The gating strategy (**A**) and statistical chart (**B–H**) showed the frequencies of NK cells (CD3<sup>+</sup>NK1.1<sup>+</sup>), B cells (CD19<sup>+</sup>), Treg cells (CD4<sup>+</sup>CD25<sup>+</sup>Foxp3<sup>+</sup>), and Th1/2/17 cells (CD3<sup>+</sup>CD4<sup>+</sup>IFNγ<sup>+</sup>/ CD3<sup>+</sup>CD4<sup>+</sup>IL-4<sup>+</sup>/ CD3<sup>+</sup>CD4<sup>+</sup>IL-17<sup>+</sup>). Data were presented as mean ± SEM. \**P* < 0.05; \*\**P* < 0.01; \*\*\**P* < 0.001. Data were one representative experiment from two experiments with similar results.
